# Supplementary material for: A Portrait of Ribosomal DNA Contacts with Hi-C Reveals 5S and 45S rDNA Anchoring Points in the Folded Human Genome
Source: PubMed Central journal article supplement — Genome Biol Evol. 2016 Nov 9;8(11):3545–58. doi: 10.1093/gbe/evw257 (PMC5203791; doi:10.1093/gbe/evw257), 2016-11-09
Supplement: supp_evw257_Supp_Figures_and_Tables.pdf [file supp_evw257_Supp_Figures_and_Tables.pdf]

# Figure S1

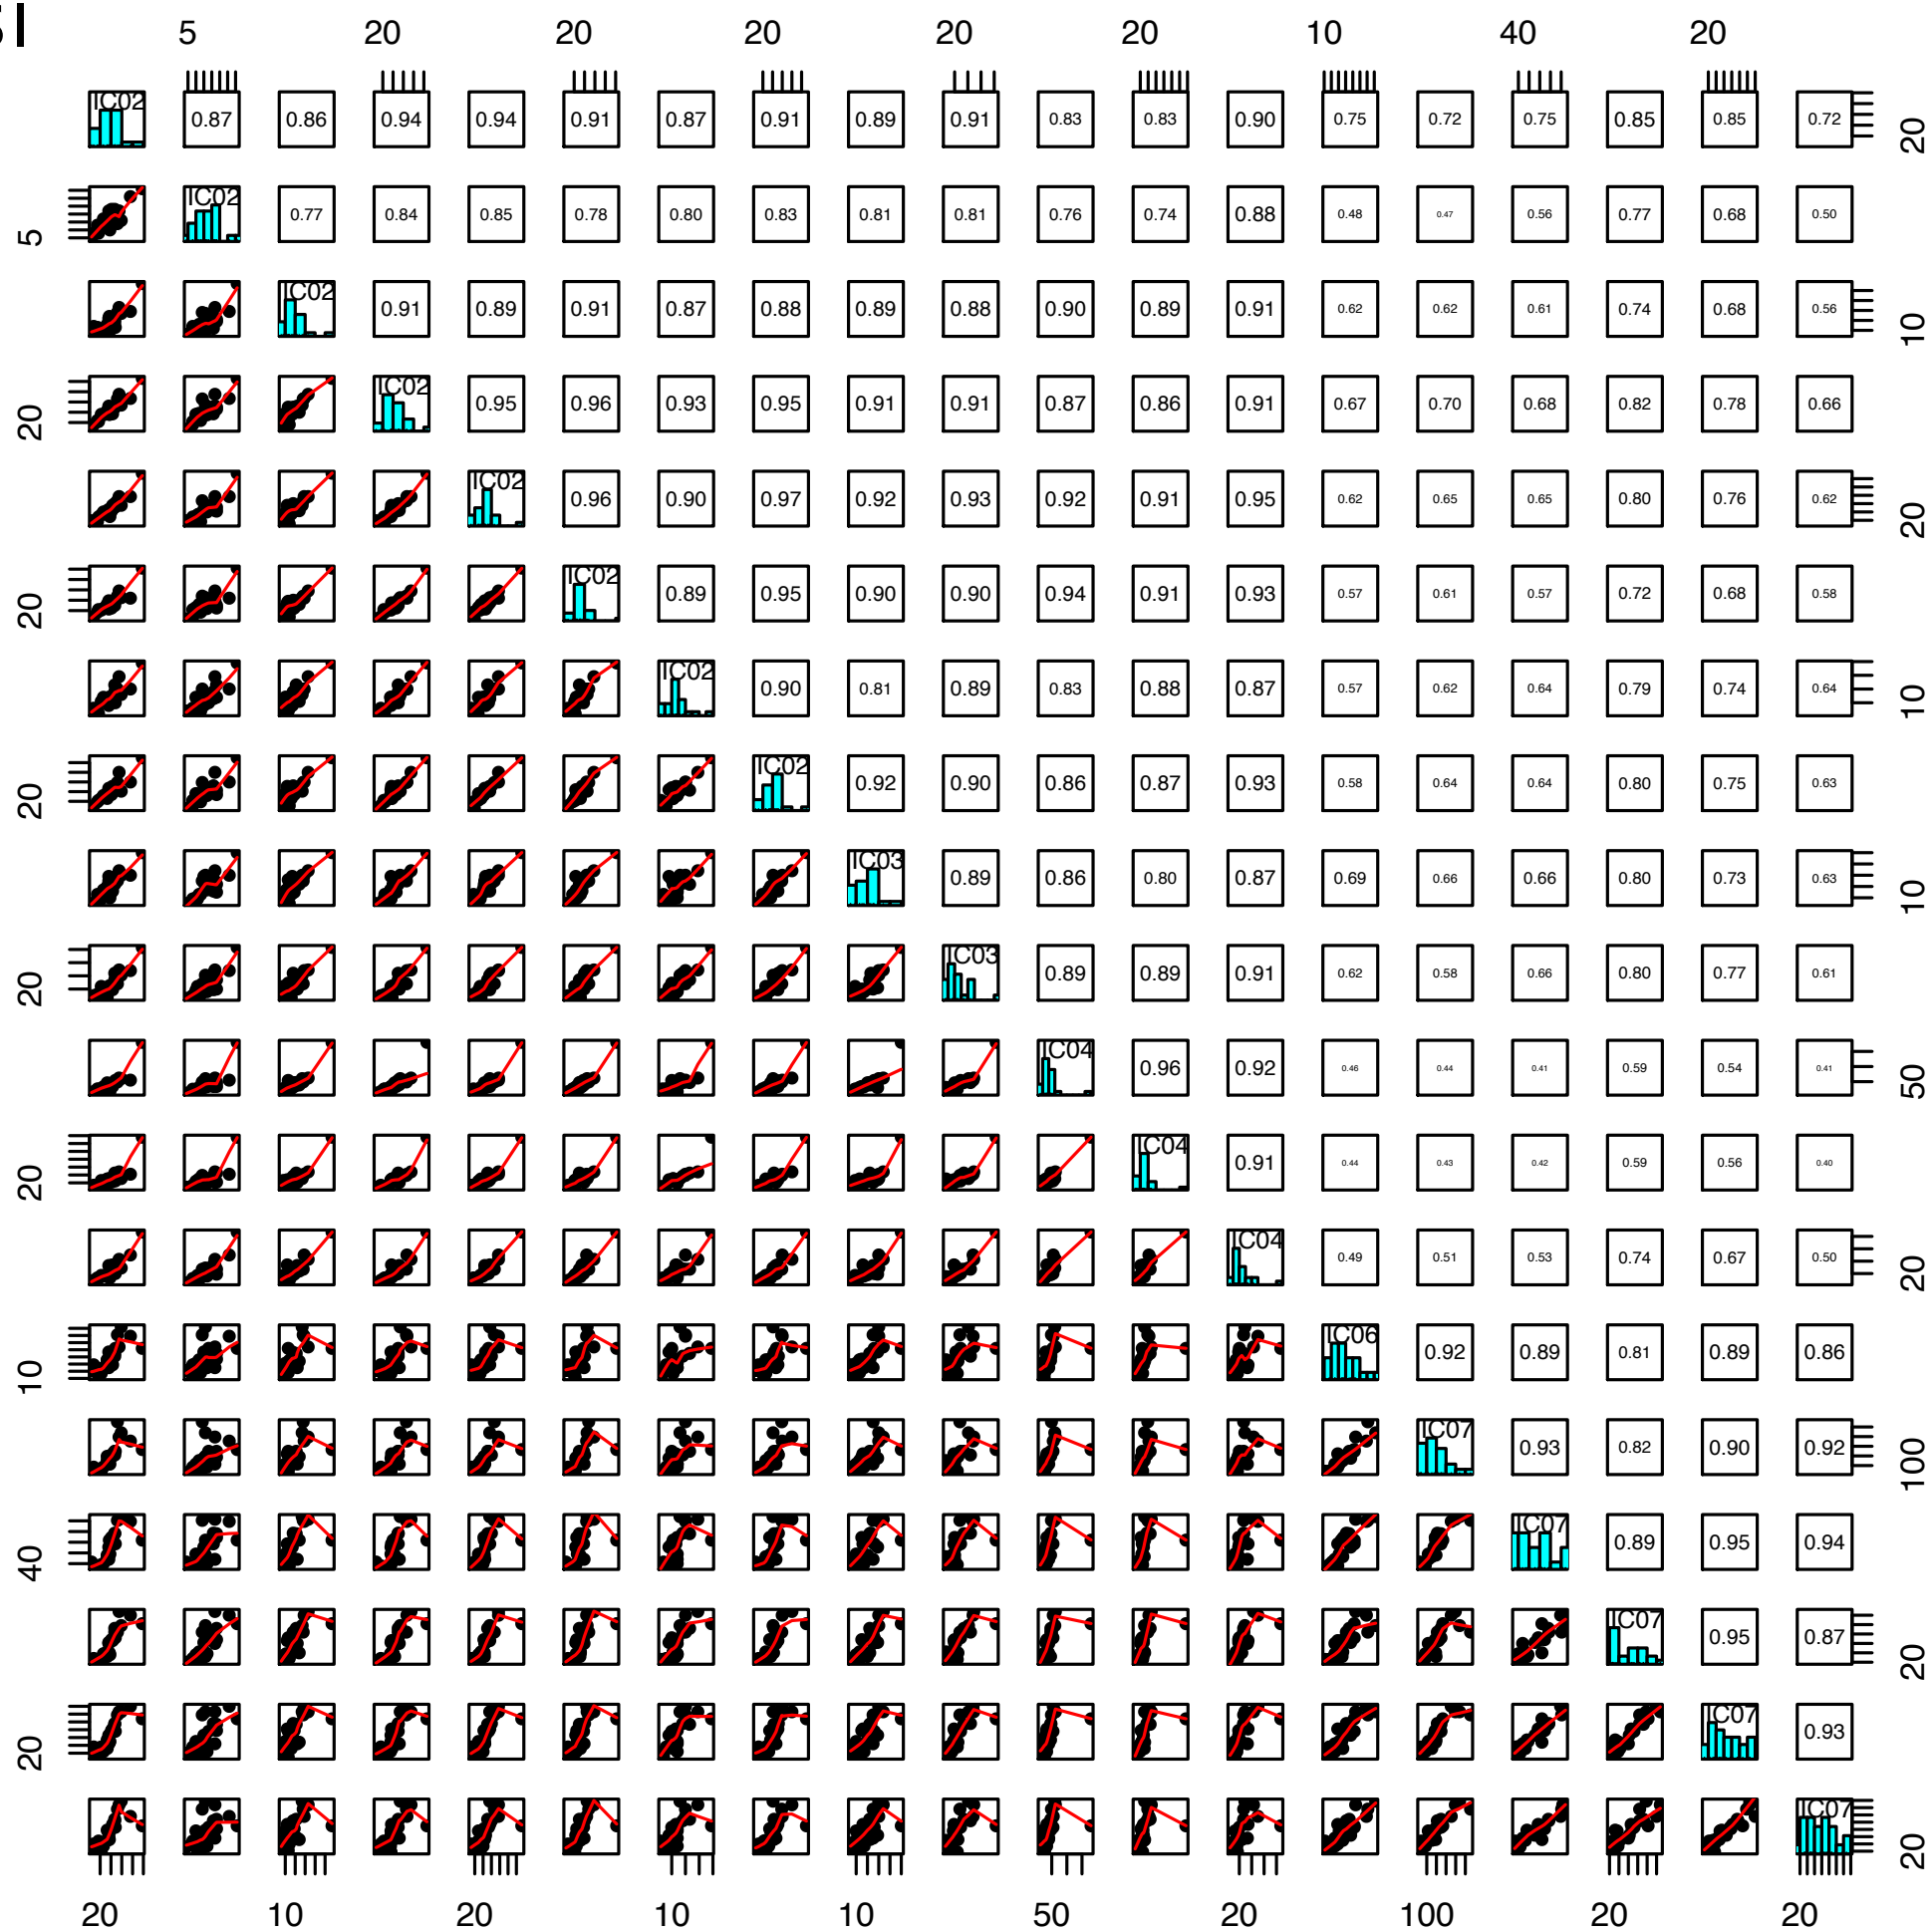



Figure S3

a

Randomization results for 1q42 region

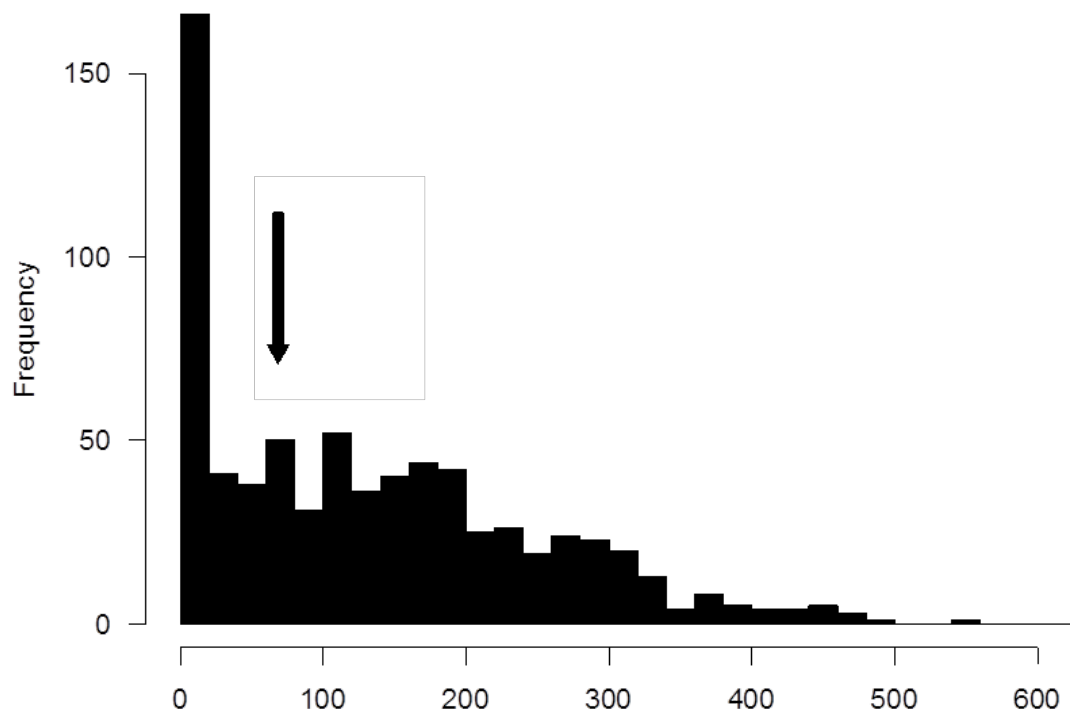

b

Randomization results for chromosome 1

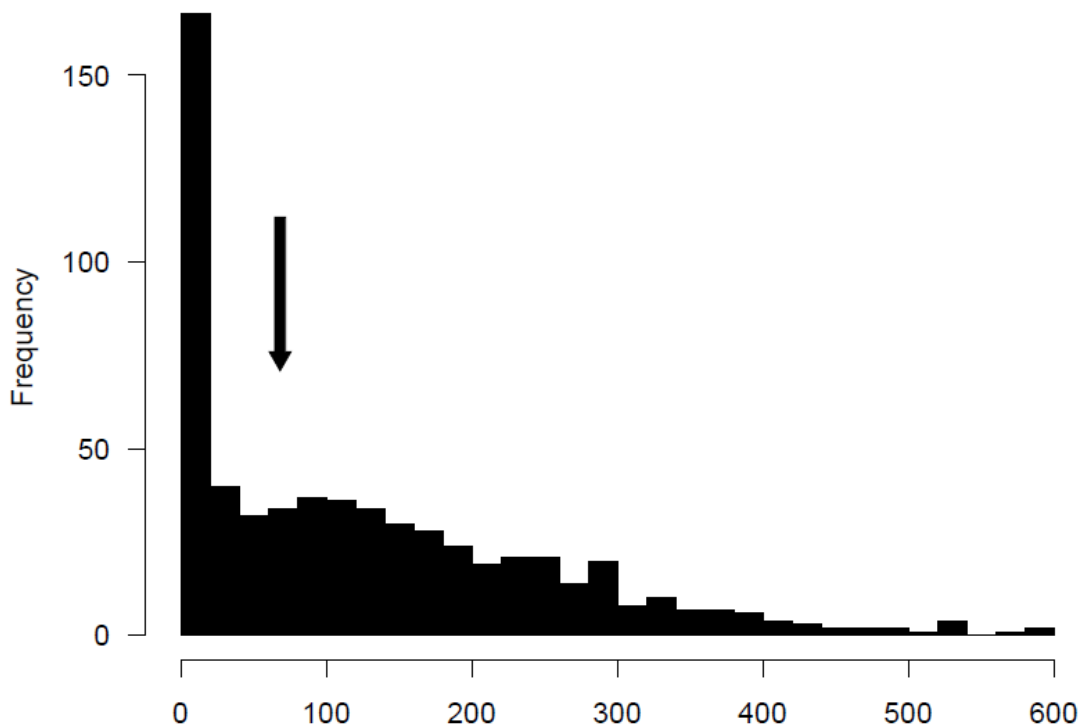

**Supplementary Table 1.** Copy number of 5S rDNA and adjacent Alu element in four human genome assemblies. CN denotes copy number in the segment.

| Assembly         | 5S CN | Alu CN |
|------------------|-------|--------|
| GRCh37           | 16    | 18     |
| HuRef            | 5     | 7      |
| CHM1_1.1         | 4     | 6      |
| CHM1tert (25255) | 1     | 3      |
| CHM1tert (25256) | 8     | 9      |
| CHM1tert (25257) | 6     | 6      |

**Supplementary Table 2.** Number of Hi-C reads mapping to the repeat masked 5S rDNA repeat unit (2121bp) in each dataset. Shown are the number of reads for which both ends map to the 5S repeat unit and the number of reads for which one end maps to the 5S rDNA repeat unit and the other maps to the rest of the genome [whole genome (WG)]. Both the 5S rDNA unit and the whole genome were masked for repetitive elements.

| Datasets | SRR number | Both ends mapped to the 5S rDNA unit | Number of reads mapped to the WG | Total number of mapped reads |
|----------|------------|--------------------------------------|----------------------------------|------------------------------|
| HIC020   | SRR1658592 | 80                                   | 2833                             | 3405                         |
| HIC021   | SRR1658593 | 14                                   | 1213                             | 1512                         |
| HIC024   | SRR1658598 | 49                                   | 1433                             | 1913                         |
| HIC025   | SRR1658599 | 26                                   | 2464                             | 2833                         |
| HIC026   | SRR1658600 | 40                                   | 2819                             | 3349                         |
| HIC027   | SRR1658601 | 25                                   | 2013                             | 2442                         |
| HIC028   | SRR1658602 | 25                                   | 1188                             | 1489                         |
| HIC029   | SRR1658603 | 97                                   | 2890                             | 3586                         |
| HIC038   | SRR1658644 | 179                                  | 1937                             | 2588                         |
| HIC039   | SRR1658645 | 379                                  | 3368                             | 4643                         |
| HIC040   | SRR1658646 | 421                                  | 4411                             | 6182                         |
| HIC041   | SRR1658647 | 253                                  | 3046                             | 4191                         |
| HIC042   | SRR1658648 | 211                                  | 2560                             | 3733                         |
| HIC069   | SRR1658693 | 219                                  | 4148                             | 5288                         |
| HIC070   | SRR1658694 | 1303                                 | 19657                            | 26355                        |
| HIC071   | SRR1658695 | 237                                  | 4928                             | 6242                         |
| HIC072   | SRR1658697 | 84                                   | 2383                             | 2715                         |
| HIC073   | SRR1658699 | 105                                  | 2663                             | 3089                         |
| HIC074   | SRR1658701 | 112                                  | 3244                             | 4002                         |
| Sum      |            | 3859                                 | 69198                            | 89557                        |

**Supplementary Table 3.** Number of Hi-C reads mapping to the repeat masked 45S rDNA repeat unit (45,337 bp) in each dataset. Shown are the number of reads for which both ends map to the 45S rDNA repeat unit and the number of reads for which one end maps to the 45S rDNA repeat unit and the other maps to the rest of the genome [whole genome (WG)]. Both the 45S rDNA unit and the whole genome were masked for repetitive elements.

| Datasets | SRR number | Both ends mapped to the<br>45S rDNA unit | Number of reads<br>mapped to the WG | Total number of<br>mapped reads |
|----------|------------|------------------------------------------|-------------------------------------|---------------------------------|
| HIC020   | SRR1658592 | 123249                                   | 447018                              | 792852                          |
| HIC021   | SRR1658593 | 36271                                    | 133667                              | 266642                          |
| HIC024   | SRR1658598 | 41400                                    | 143169                              | 277034                          |
| HIC025   | SRR1658599 | 78738                                    | 453930                              | 766455                          |
| HIC026   | SRR1658600 | 79754                                    | 464742                              | 787493                          |
| HIC027   | SRR1658601 | 74818                                    | 361846                              | 648994                          |
| HIC028   | SRR1658602 | 25259                                    | 120077                              | 207967                          |
| HIC029   | SRR1658603 | 57529                                    | 283331                              | 498297                          |
| HIC038   | SRR1658644 | 61629                                    | 142514                              | 264786                          |
| HIC039   | SRR1658645 | 86276                                    | 189732                              | 382172                          |
| HIC040   | SRR1658646 | 77265                                    | 197413                              | 422356                          |
| HIC041   | SRR1658647 | 53207                                    | 141085                              | 296548                          |
| HIC042   | SRR1658648 | 74238                                    | 180581                              | 381876                          |
| HIC069   | SRR1658693 | 39821                                    | 121685                              | 251368                          |
| HIC070   | SRR1658694 | 152853                                   | 414490                              | 809402                          |
| HIC071   | SRR1658695 | 18320                                    | 147131                              | 218833                          |
| HIC072   | SRR1658697 | 8330                                     | 82189                               | 110106                          |
| HIC073   | SRR1658699 | 9077                                     | 81039                               | 110891                          |
| HIC074   | SRR1658701 | 16607                                    | 133877                              | 197463                          |
| Sum      |            | 1114641                                  | 4239516                             | 7691535                         |
